# Supplementary material
Source: PubMed Central journal article supplement (PMC6913781)
Supplement: Supp_Fig1.pdf [file Supp_Fig1.pdf]

## Supplementary Data

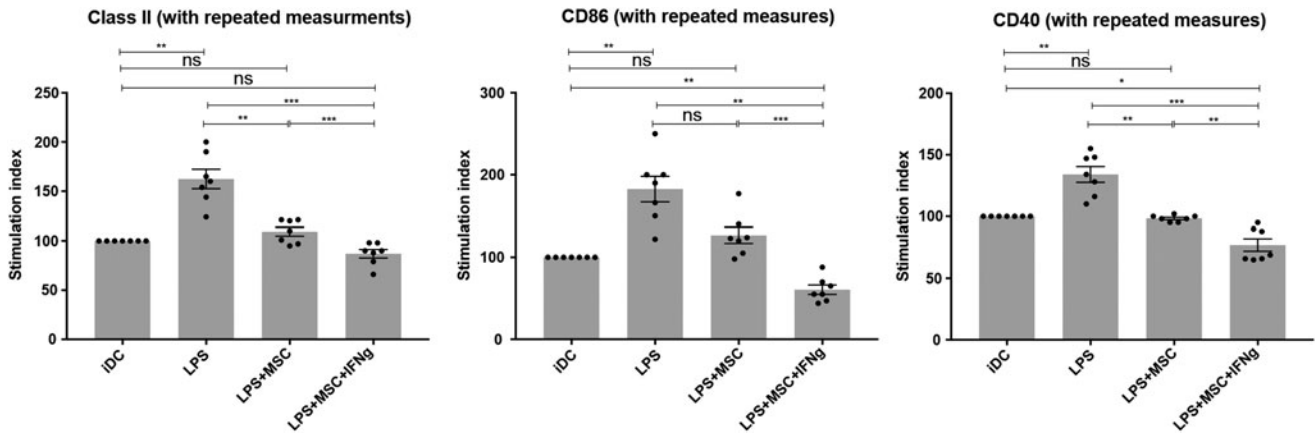

**SUPPLEMENTARY FIG. S1.** Comparative/cumulative differential expression of canine dendritic cell (DC) activation markers (MHCII, CD86, and CD40) in lipopolysaccharide (LPS)-treated MSC/DC cocultures. A comparative analysis of biological replicates was performed to illustrate the MSC-mediated suppression of DC activation among seven dogs examined in this study. The stimulation index of 100 was arbitrarily set for the unstimulated resting/immature DC (iDC). The stimulation index is represented by percent increase or decrease for each dog illustrated by a solid *dot*, while the overall stimulation index for the group is represented by the bars. The SEM of the average stimulation index per treatment for the seven dogs is represented by the vertical spanning line. *P* values for statistical variance were determined using Repeated Measures ANOVA with Tukey's multiple comparison tests. \**P*<0.05, \*\**P*<0.01, and \*\*\**P*<0.005. MSC, mesenchymal stem cells; SEM, standard error measurement.
