# Supplementary material
Source: PubMed Central journal article supplement (PMC6913781)
Supplement: Supp_Fig2.pdf [file Supp_Fig2.pdf]

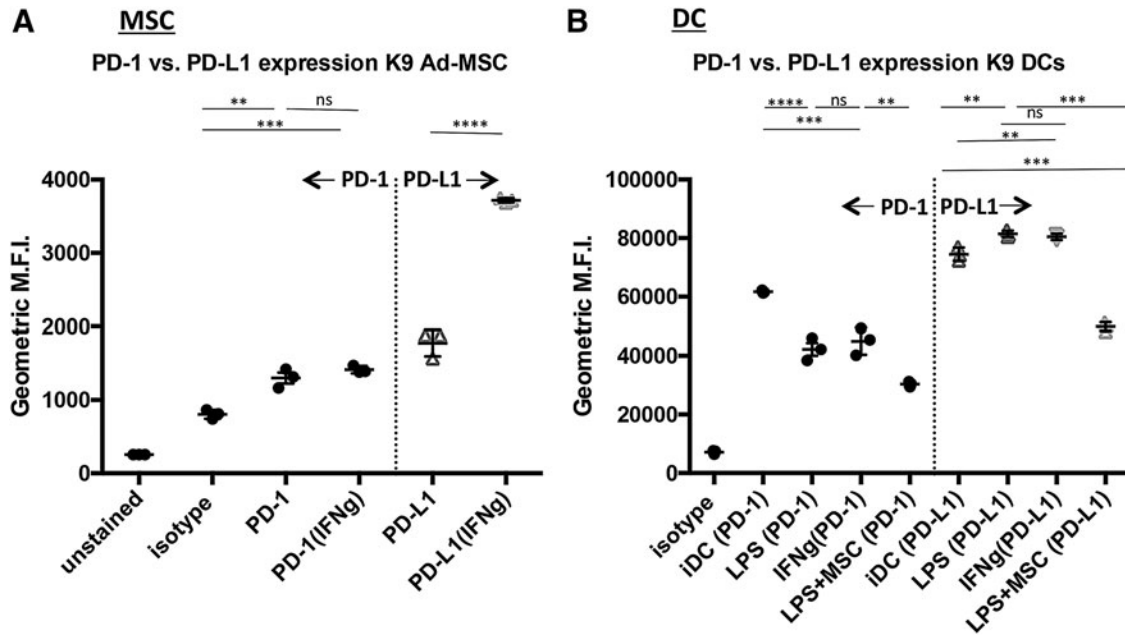

**SUPPLEMENTARY FIG. S2.** Expression of programmed death protein-1 (PD-1) and programmed death ligand-1 (PD-L1) in MSC versus DC. The extent of PD-1 and PD-L1 expression was determined by flow cytometry using mouse anti-canine PD-1 or PD-L1 monoclonal antibodies followed by an Alexa Fluor<sup>®</sup> 647-conjugated F(ab')<sub>2</sub> fragment donkey anti-mouse IgG secondary antibody. **(A)** Comparison of geometric mean fluorescence intensity (MFI) of PD-1 versus PD-L1 expression on untreated or interferon gamma (IFN $\gamma$ )-treated MSC alone. **(B)** Comparison of geometric MFI of PD-1 versus PD-L1 on DC alone treated with LPS, IFN $\gamma$ , or in coculture with IFN $\gamma$ -treated MSC. *P* values calculated for statistical variance were determined using a paired two-tailed Mann-Whitney test. \**P* < 0.05, \*\**P* < 0.01, \*\*\**P* < 0.005, and \*\*\*\**P* < 0.001.
