# Supplementary material
Source: PubMed Central journal article supplement (PMC6913781)
Supplement: Supp_Fig3.pdf [file Supp_Fig3.pdf]

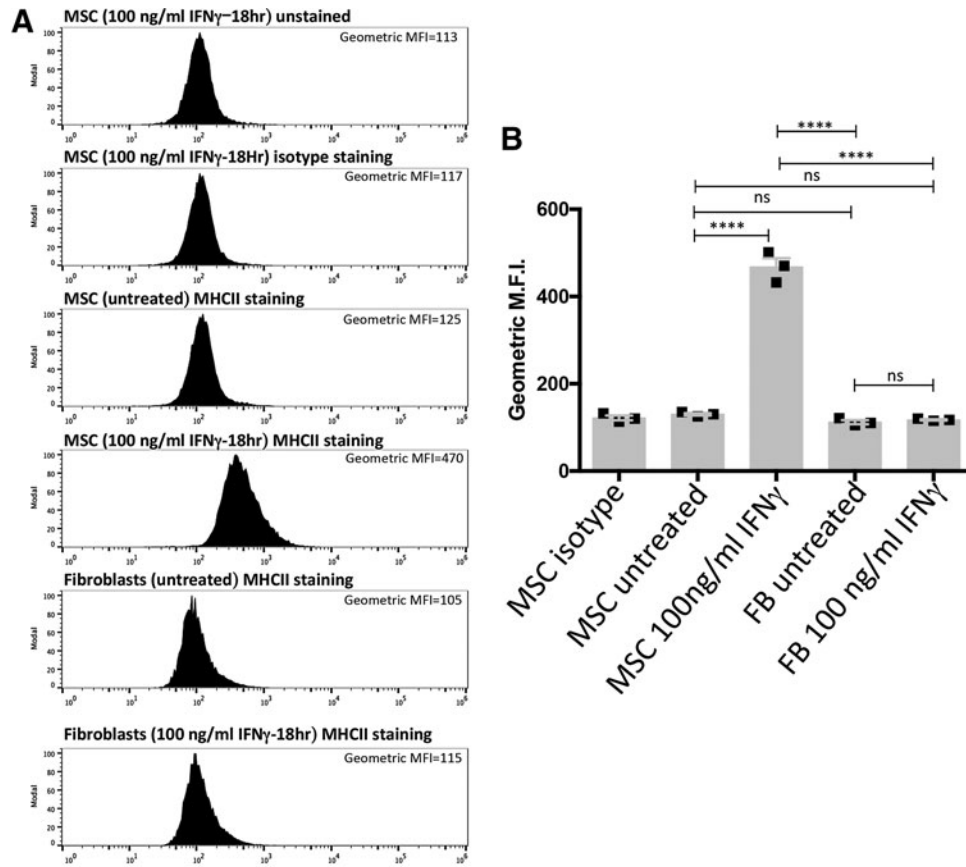

**SUPPLEMENTARY FIG. S3.** Comparison of MHCII upregulation by IFN $\gamma$  on MSC versus skin fibroblast (FB). Canine (P2) MSC or skin FB was cultured either without or in the presence of 100 ng/mL canine IFN $\gamma$  for 18 hr. Cells were harvested and stained with a FITC-conjugated mouse anti-canine MHCII, and the geometric MFI was assessed by flow cytometry. **(A)** Raw flow cytometry data showing the comparison of MFI of MHCII in representative histograms between MSC versus FB. **(B)** Summary data of FITC MFI of triplicate culture samples. Data are representative of four independent experiments. *P* values calculated for statistical variance were determined using a paired two-tailed Mann–Whitney test. \**P* < 0.05, \*\**P* < 0.01, \*\*\**P* < 0.005, and \*\*\*\**P* < 0.001.
