# Supplementary material
Source: PubMed Central journal article supplement (PMC6913781)
Supplement: Supp_Fig4.pdf [file Supp_Fig4.pdf]

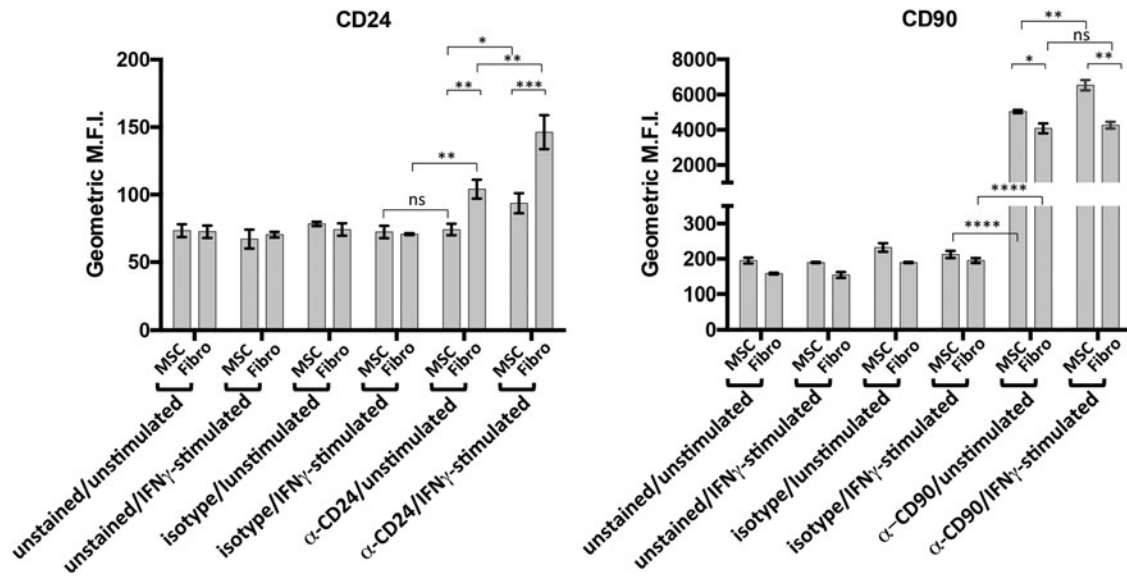

**SUPPLEMENTARY FIG. S4.** Comparison of surface phenotype of canine MSC and skin FB. MSC or skin FB was cultured in complete Dulbecco's modified Eagle's medium in triplicate at  $10^4$  cells/mL in the absence or presence of 100 ng/mL canine IFN $\gamma$  for 18 hr. Cells were harvested and stained for surface expression of CD24 and CD90, using fluorochrome-conjugated antibodies and analyzed by flow cytometry. Data are representative of four independent experiments. *P* values calculated for statistical variance were determined using a paired two-tailed Mann-Whitney test. \**P* < 0.05, \*\**P* < 0.01, \*\*\**P* < 0.005, and \*\*\*\**P* < 0.001.
